# Supplementary material for: High-resolution dynamic mapping of the C. elegans intestinal brush border
Source: Oxford University Press journal article supplement (doi:10.1242/dev.200029), 2021-10-27
Supplement: dev200029supp.pdf [file dev200029supp.pdf]

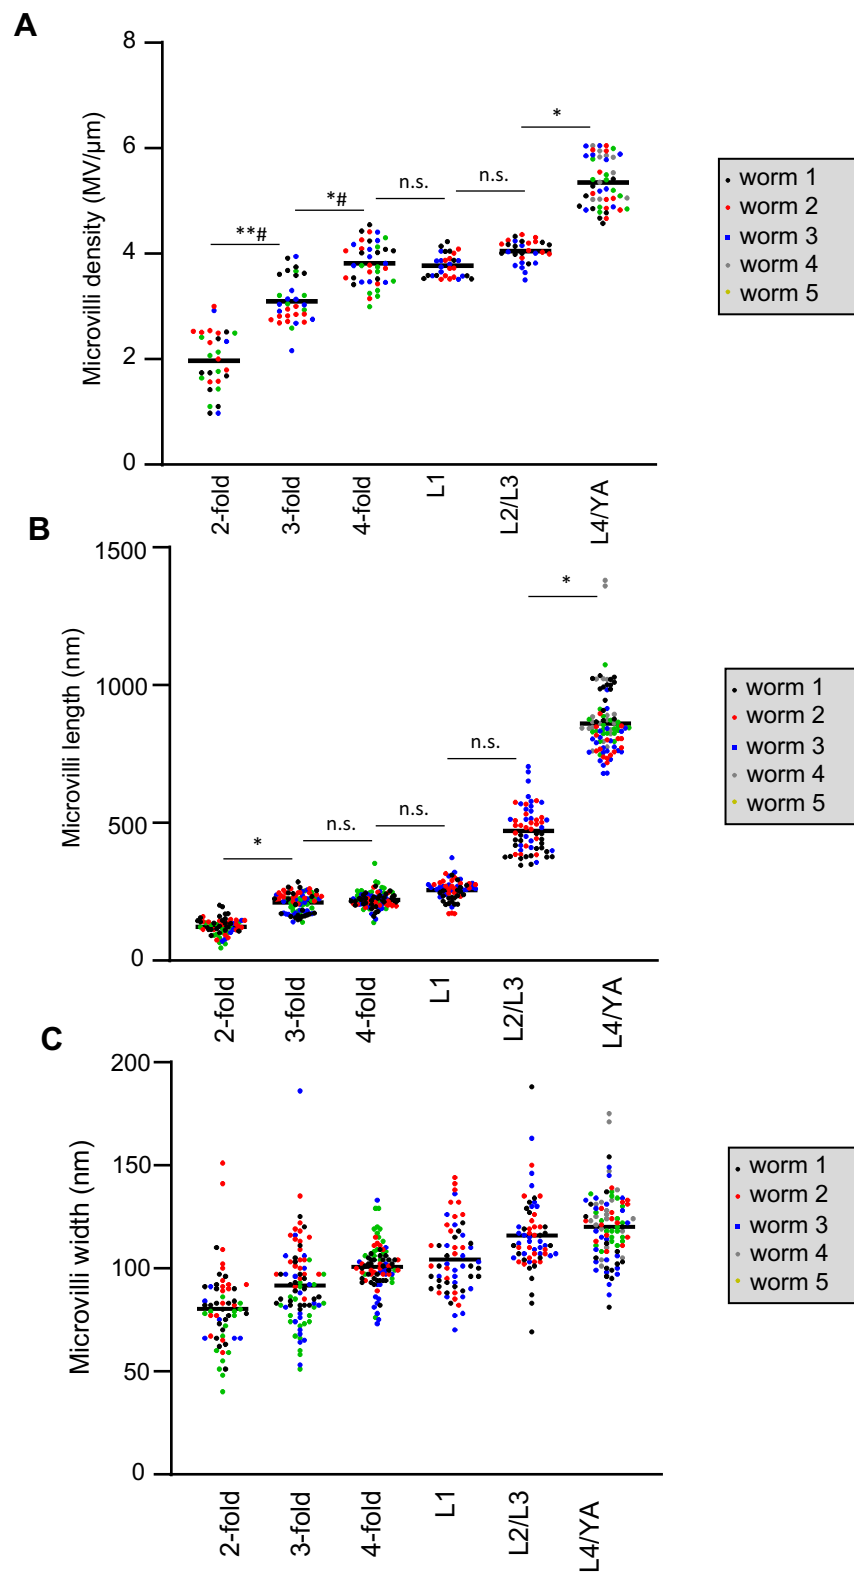

**Fig. S1. Individual values of brush border measurements by TEM, related to Fig. 1.**

Colorized dots represent individual worms at the indicated developmental stages. Bar is the grand mean of all the measurements. Microvilli density was measured on 3-13 slices/worm, microvilli length and width on 6-29 microvilli/worm. N.s., non-significant, \* $p < 0,05$ , \*\* $p < 0,01$ . Except in A, where some data were analysed by unpaired t-test (#), statistical significance was calculated using Mann-Whitney test.

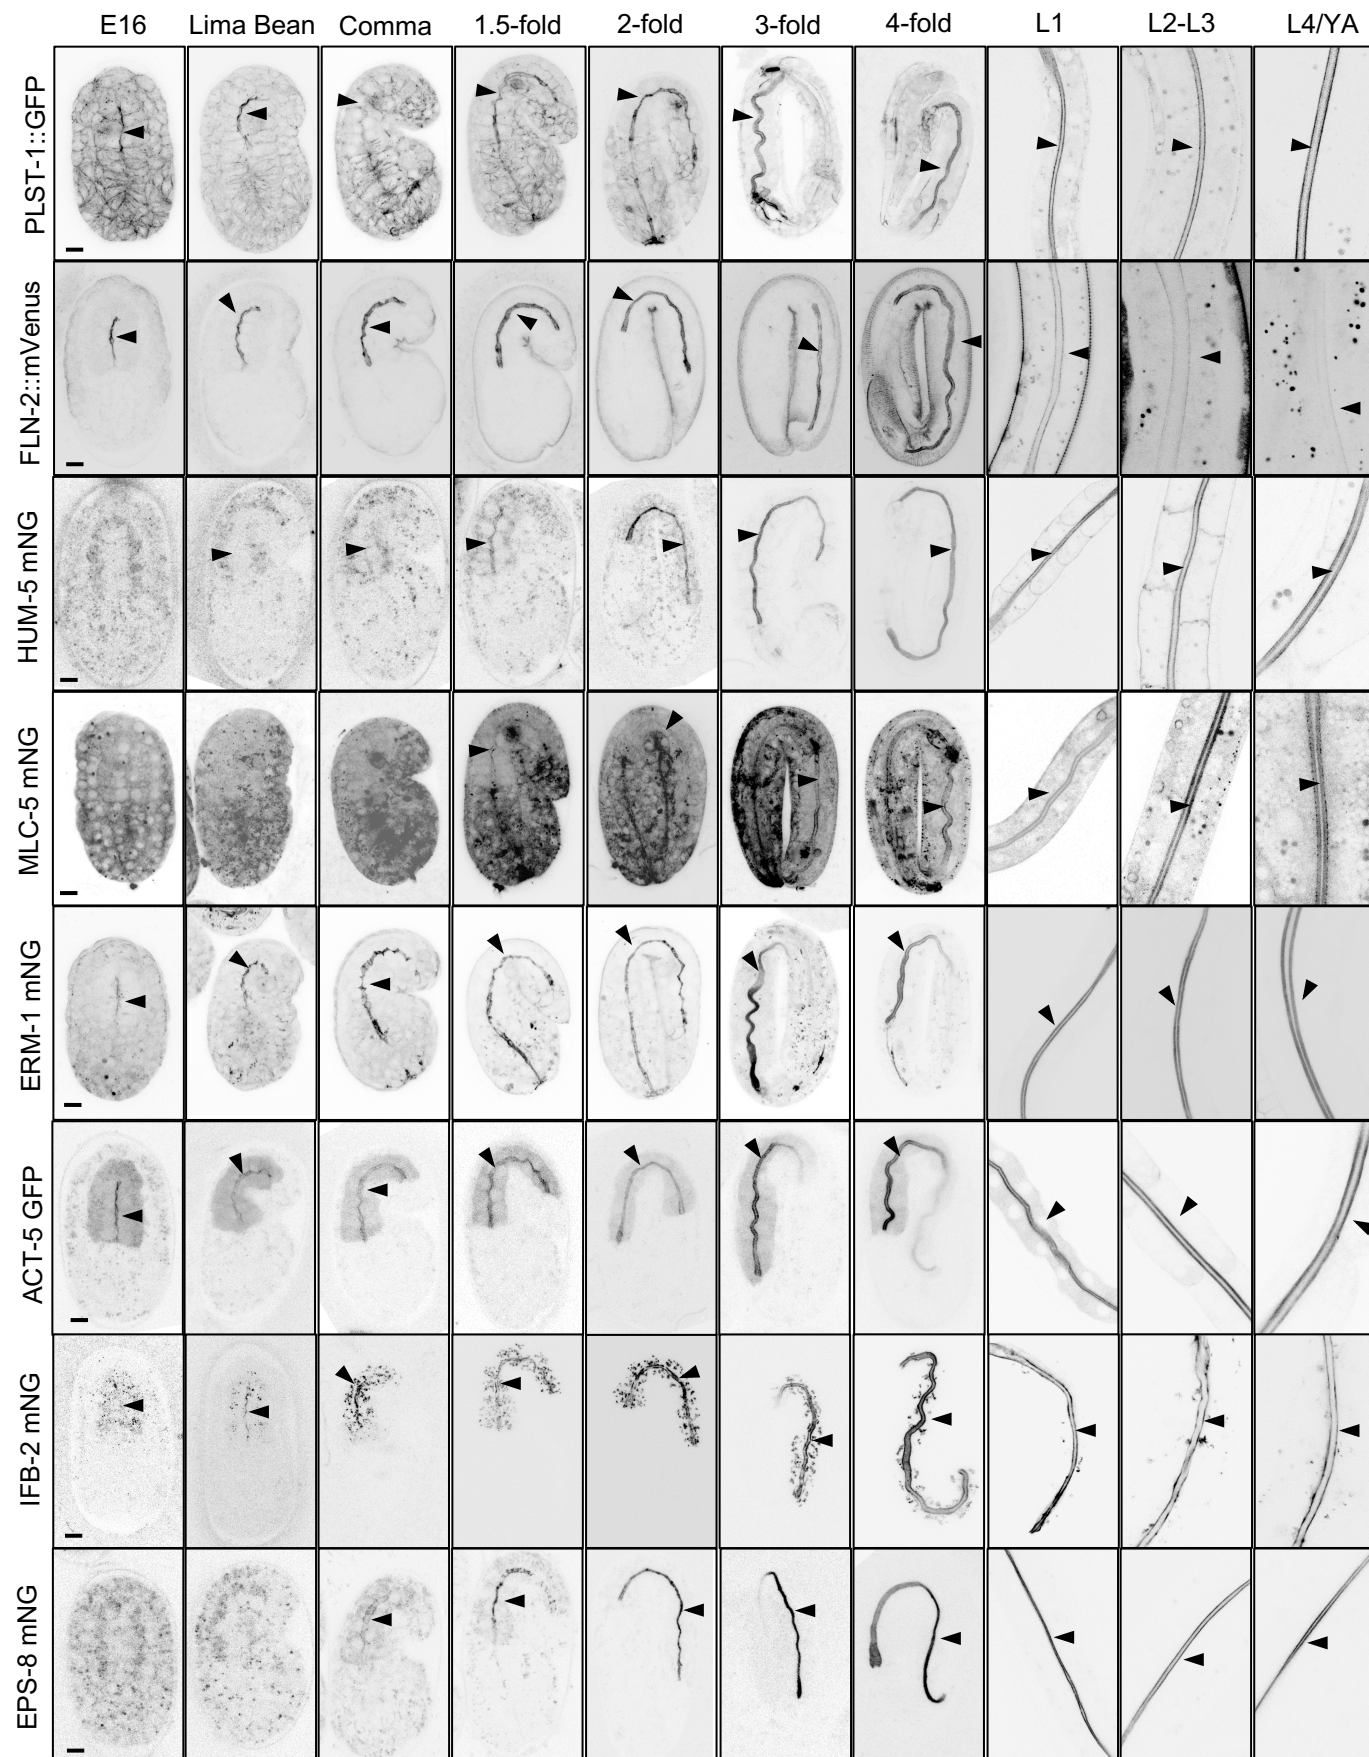

**Fig. S2. Systematic analysis of brush border markers during *C. elegans* development.** Representative confocal images of the endogenously tagged markers indicated (except ACT-5::GFP). Arrowheads show the intestinal cells apical PM. Scale bar is 5  $\mu$ m.



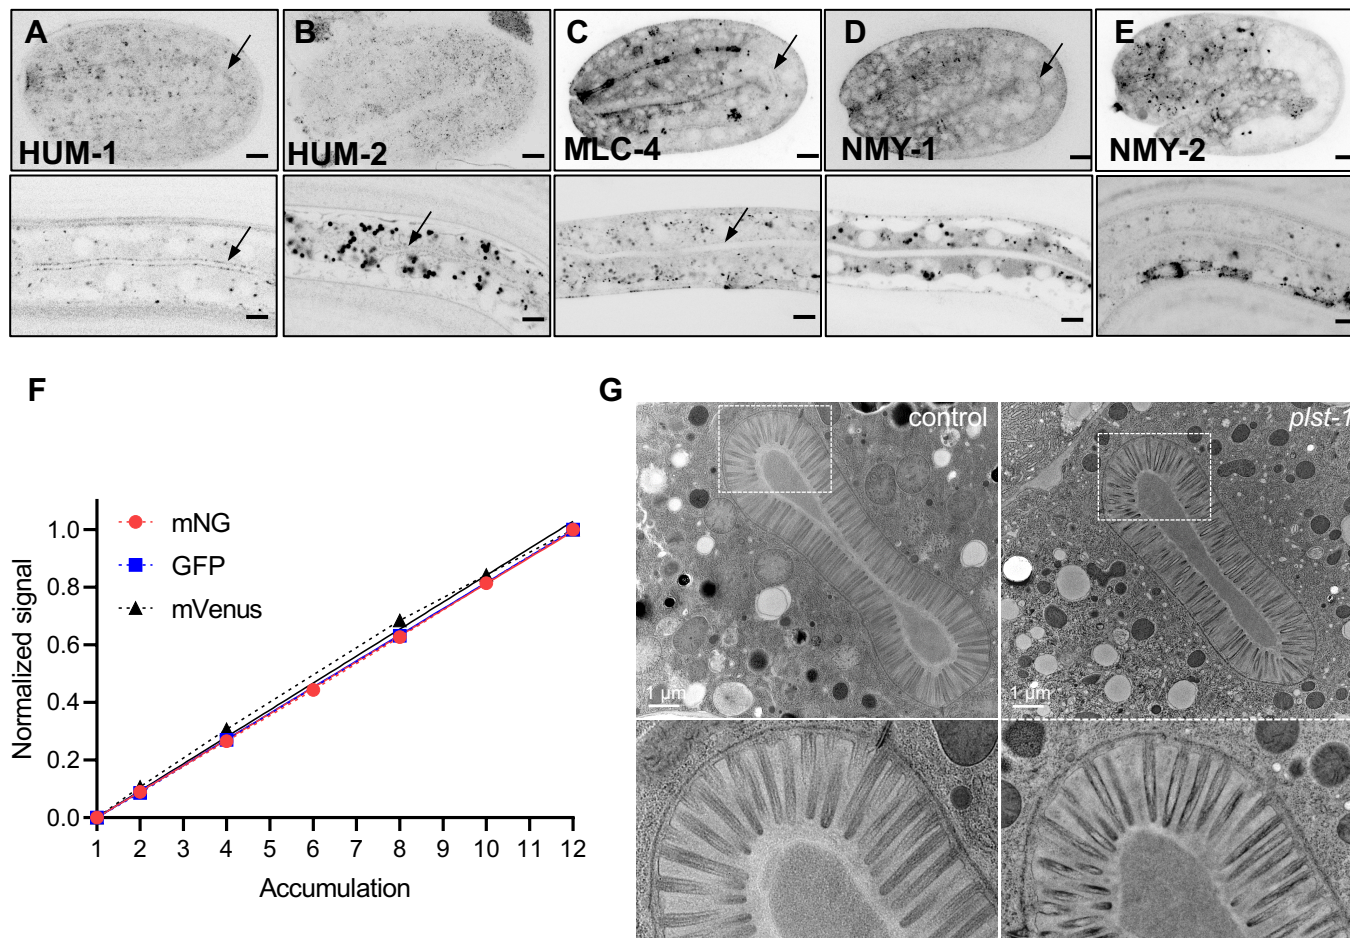

**Fig. S3. Systematic analysis of brush border markers during *C. elegans* development.**

(A-E) Representative confocal images of *C. elegans* strains expressing endogenously tagged versions of the indicated markers, which showed no apical accumulation during *C. elegans* intestine development. Scale bar, 5  $\mu$ m. (F) Control of the quantitative assessment of brush border markers arrival at the apical PM. Accumulation of IFB-2::mNG, PLST-1::GFP and FLN-2::mVenus signal linearly increases with image accumulation. Experimental points are linked by dashed lines, bold lines show simple linear regression curve fitting. n=1-2 measurement per timepoint for each fluorophore. (G) Representative TEM images of control (N2) and *plst-1(tm4255)* L4/young adult worms (N=3 worms in each condition).

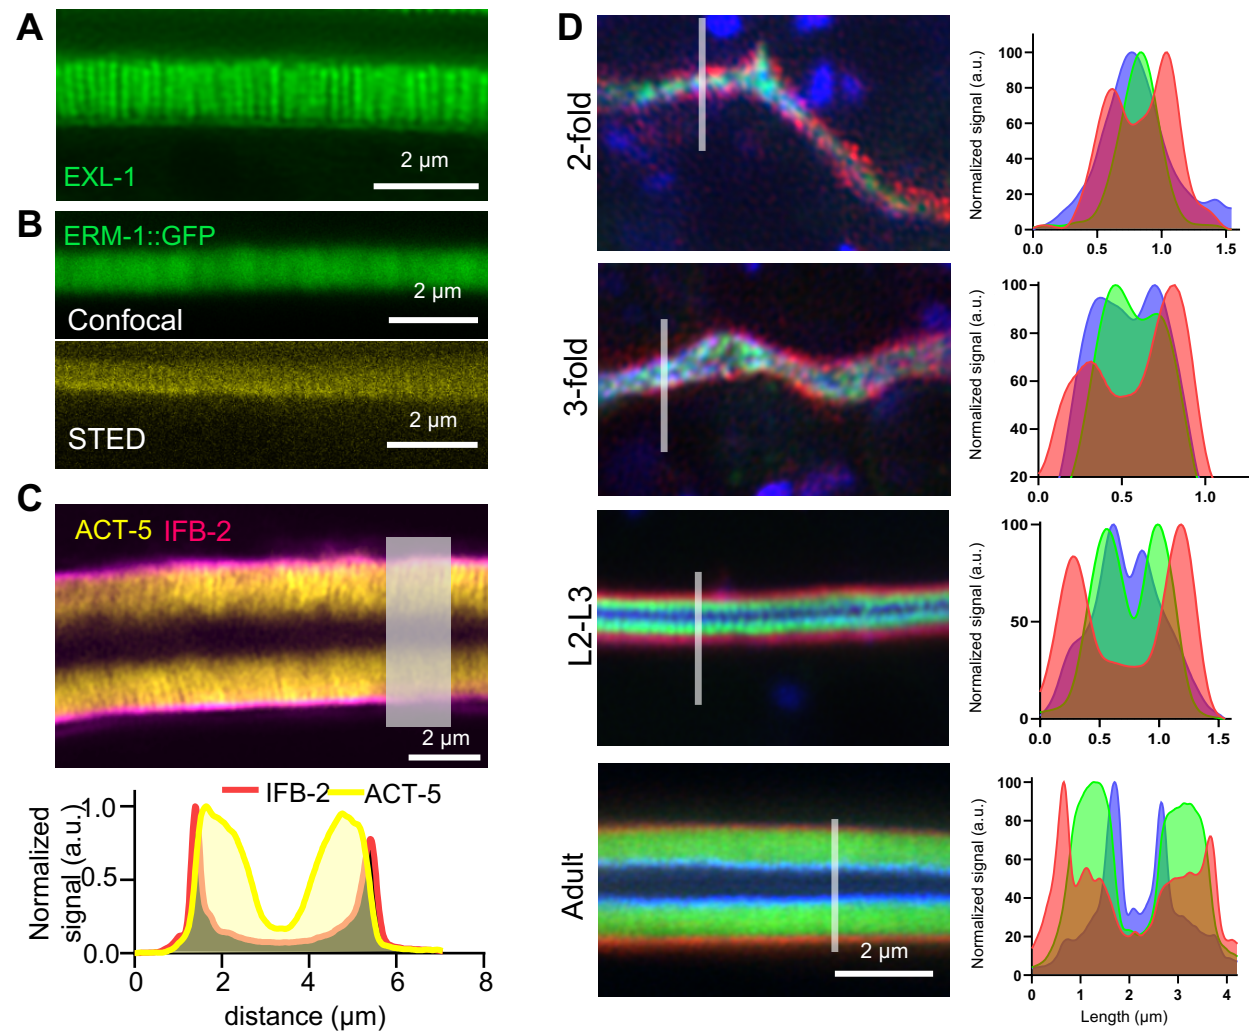

**Fig. S4. Super-resolution imaging of brush border markers *in vivo*.** (A) Representative super-resolution image of exogenously expressed EXL-1::GFP. (B) ERM-1::GFP was imaged in adult worms using the indicated microscopes. (C) Super-resolution images of a *C. elegans* adults co-expressing ACT-5::GFP and IFB-2::wSc. Bottom panel shows a normalized intensity profile along the line depicted in grey. (D) Representative images of the localization of endogenously tagged EPS-8::BFP, ERM-1::mNG and IFB-2::wSc in *C. elegans* at the indicated developmental stages. Right panels show an intensity profile of the three markers along the line depicted in left panels. Scale bars, 2  $\mu\text{m}$ .



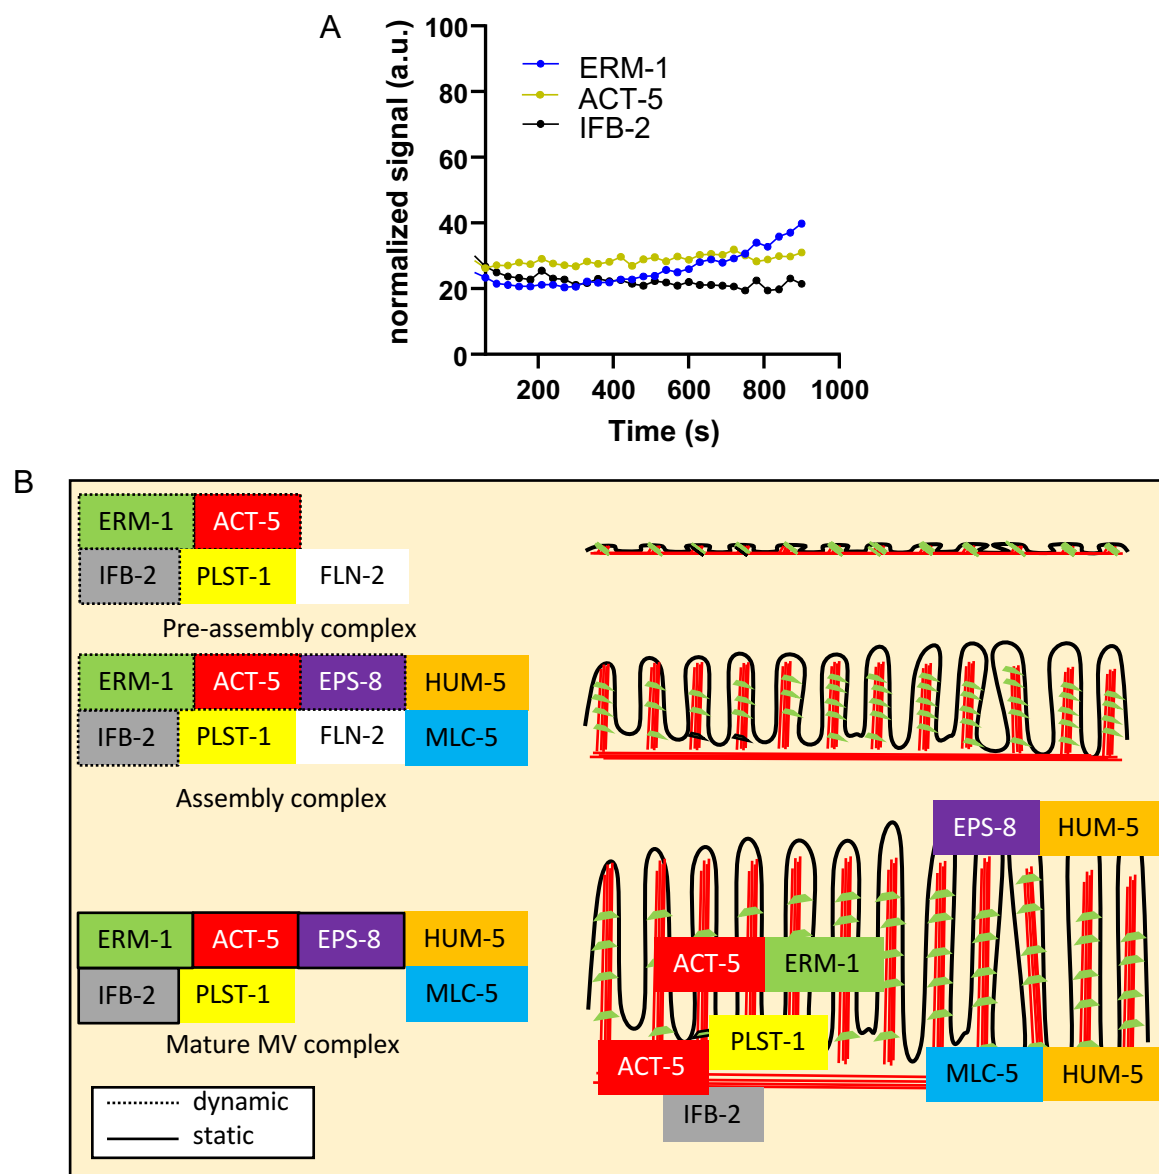

**Fig. S5. Dynamic recruitment of brush border components.**

(A) Longer measurement of brush border components dynamics in adult worms. The curves show the recovery of ERM-1::mNG, IFB-2::mNG and ACT-5::GFP signal every 30 s after photobleaching, measured for an extended time,  $n=1$  for each marker. (B) Model of brush border assembly *in vivo* in *C. elegans*. Microvilli are built from a preformed *pre-assembly complex* and grow through the dynamic recruitment of brush border components, which become highly stable in the mature brush border.

**Table S1. *C. elegans* strains used in this study.**

| Strain | Markers/targets     | Genotype                                                                                           | Reference                   |
|--------|---------------------|----------------------------------------------------------------------------------------------------|-----------------------------|
| FBR96  | MLC-4               | mlc-4(jme04[mlc-4::eGFP+loxP]) III                                                                 | Francois Robin lab          |
| FBR140 | MLC-5               | mlc-5(jme09[GFP^3xFLAG::mlc-5]) III                                                                | Francois Robin lab          |
| FBR222 | FLN-2               | fln-2(jme-19[fln-2::mVenus]) X                                                                     | Francois Robin lab          |
| FL274  | ERM-1, IFB-2        | erm-1(bab59[erm-1::mNG^SEC^3xFlag]) I ; ifb-2(bab142[ifb-2::wSc]) II                               | Bidaud-Meynard et al., 2019 |
| FL290  | EPS-8               | eps-8(bab140[eps-8::mNG]) IV                                                                       | This study                  |
| FL369  | ERM-1, ACT-5        | fgEx13[perm-1::erm-1::gfp + rol-6 (su1006)] ; jyls17 [vha-6p::mcherry::act-5, ttx-3p::RFP]         | Bidaud-Meynard et al., 2019 |
| FL378  | ERM-1               | erm-1(bab59[erm-1::mNG^3xFlag]) I                                                                  | Bidaud-Meynard et al., 2019 |
| FL379  | ERM-1               | bab64[erm-1::wrmSc^3xFlag] I                                                                       | Bidaud-Meynard et al., 2019 |
| FL381  | ACT-5, IFB-2        | fgEx12 (act-5p::act-5::gfp); ifb-2(bab142[ifb-2::wrmSc]) II                                        | This study                  |
| FL383  | EPS-8, ERM-1, IFB-2 | eps-8(bab140[eps-8::mNG]) IV ; erm-1(bab59[erm-1::mNG^SEC^3xFlag]) I; ifb-2(bab142[ifb-2::wSc]) II | This study                  |
| FL384  | ERM-1               | erm-1(bab167[erm-1::degron-tagBFP2]) I                                                             | This study                  |
| FL385  | IFB-2               | ifb-2(bab153[ifb-2::mNG]) II                                                                       | This study                  |
| FL386  | ERM-1, PLST1        | erm-1(bab167[erm-1::degron-tagBFP2]) ; plst-1(msn190[plst-1::gfp]) IV                              | This study                  |
| FL387  | ERM1, HUM5          | erm-1(bab167[erm-1::degron-tagBFP2]) ; hum-5(bab189[hum-5::mNG]) III                               | This study                  |
| FL388  | ERM-1, MLC5         | erm-1(bab167[erm-1::degron-tagBFP2]) ; mlc-5(jme09[GFP^3xFLAG::mlc-5]) III                         | This study                  |
| FL586  | ERM-1, FLN-2        | erm-1(bab167[erm-1::degron-tagBFP2]), fln-2(jme-19[fln-2::mVenus]) X                               | This study                  |
| LP162  | NMY-2               | nmy-2(cp13[nmy-2::GFP + LoxP]) I                                                                   | CGC                         |
| LP462  | MRCK-1              | mrck-1(cp189[mrck-1::GFP::3xFlag]) V                                                               | CGC                         |
| MCP111 | PGP-1               | pgp-1(bab111[mNG^3xFlag::pgp-1]) IV                                                                | Bidaud-Meynard et al., 2019 |
| MCP184 | HUM-2               | hum-2(bab184[hum-2::mNG]) V                                                                        | This study                  |
| MCP189 | HUM-5               | hum-5(bab189[hum-5::mNG]) III                                                                      | This study                  |
| MCP223 | EXL-1               | exl-1(bab223[exl-1::mNG]) II                                                                       | This study                  |
| ML2540 | NMY-1               | nmy-1(mc82[nmy-1::gfp]) X.                                                                         | Vuong-Brender et al., 2017  |
| OH2211 | EXL-1               | otEx1184 [exl-1p::exl-1::GFP + rol-6(su1006)]                                                      | CGC                         |
| QQ226  | HUM-1               | hum-1(cv21[hum-1::RFP]) I                                                                          | CGC                         |
| RZB213 | PLST-1              | plst-1(msn190[plst-1::gfp]) IV                                                                     | Ding et al., 2017           |
| RZB365 | PLST-1              | plst-1(tm4255)                                                                                     | Ronen Zaidel-Bar lab        |
| VJ268  | ACT-5               | fgEx12(act-5p::act-5::gfp)                                                                         | Zhang et al., 2012          |

**File S1.**

[Click here to download Supplementary File 1](#)
